# Supplementary material for: Hepatic AMPK signaling dynamic activation in response to REDOX balance are sentinel biomarkers of exercise and antioxidant intervention to improve blood glucose control
Source: eLife. 2022 Sep 26;11:e79939. doi: 10.7554/eLife.79939 (PMC9645808; doi:10.7554/eLife.79939)
Supplement: Figure 2—source data 2. [file elife-79939-fig2-data2.xlsx]

## Sheet: Sheet1
Figure 2_source data_02
Figure 2C					Average of internal reference				normalize to Internal reference					normalize to CTL
	CTL	T2D	CE		CTL	T2D	CE		CTL	T2D	CE		AVER. Of CTL	CTL	T2D	CE
NOX	165.41	167.76	214.7		83.8	82.535	85.025		1.97387	2.03259	2.52514		2.02678	0.977162	1.00623	1.25007
(without normalize)	181.02	193.87	213.61						2.16014	2.34894	2.51232			1.06938	1.16284	1.24372
	157.02	160.11	199.45						1.87375	1.9399	2.34578			0.927598	0.960349	1.16128
	168.81	180.54	197.95						2.01444	2.18744	2.32814			0.997247	1.08289	1.15254
	159.69	162.68	203.73						1.90561	1.97104	2.39612			0.943371	0.975764	1.1862
	173.94	184.92	203.83						2.07566	2.2405	2.39729			1.02755	1.10916	1.18678
	168.65	171.96	221.11						2.01253	2.08348	2.60053			0.996302	1.03143	1.28739
	184.21	198.38	221.83						2.19821	2.40359	2.609			1.08822	1.18989	1.29158
Figure 2D					Average of internal reference				normalize to Internal reference					normalize to CTL
	CTL	T2D	CE		CTL	T2D	CE		CTL	T2D	CE			CTL	T2D	CE
COX2	66.29	125.46	176.92		83.8	82.535	85.025		0.79105	1.52008	2.0808		0.890618	0.88882	1.70796	2.33798
(without normalize)	81.33	131.56	170.47						0.970525	1.59399	2.00494			1.09048	1.791	2.25274
	69.3	123.4	179.9						0.826969	1.49512	2.11585			0.929179	1.67991	2.37736
	80.09	129.8	166.34						0.955728	1.57267	1.95637			1.07385	1.76704	2.19816
	66.1	131.2	186.8						0.788783	1.58963	2.197			0.886273	1.7861	2.46854
	85.15	138.4	178.9						1.01611	1.67686	2.10409			1.1417	1.88412	2.36414
	67.8	125.3	180.4						0.809069	1.51814	2.12173			0.909067	1.70578	2.38397
	81.01	131.7	166.36						0.966706	1.59569	1.9566			1.08619	1.79291	2.19843
Figure 2F					Average of internal reference				normalize to Internal reference					normalize to CTL
	CTL	T2D	CE		CTL	T2D	CE		CTL	T2D	CE			CTL	T2D	CE
Nrf2	165.5	160	168		112.3	112.775	102.705		1.47373	1.41882	1.63583		1.33304	1.08363	1.04325	1.20282
	131	157	173						1.16652	1.39221	1.68452			0.857734	1.02369	1.23862
	165.1	163	169						1.47017	1.44542	1.64557			1.08101	1.06281	1.20998
	134	161	178						1.19323	1.42768	1.7332			0.877377	1.04977	1.27441
	165	173	187						1.46928	1.5341	1.82084			1.08035	1.12801	1.33885
	141	174	194						1.25557	1.54296	1.889			0.92321	1.13453	1.38897
	160	168	179						1.42476	1.48976	1.74294			1.04761	1.09541	1.28157
	136	166	187						1.21104	1.47202	1.82084			0.890472	1.08237	1.33885
Figure 2G					Average of internal reference				normalize to Internal reference					normalize to CTL
	CTL	T2D	CE		CTL	T2D	CE		CTL	T2D	CE			CTL	T2D	CE
Sestrin2	69	118	170		112.3	112.775	102.705		0.614426	1.04638	1.65531		0.625557	0.975279	1.66092	2.62747
	74	153	162						0.658949	1.35674	1.57741			1.04595	2.15356	2.50383
	66	114	164						0.587711	1.01091	1.59688			0.932875	1.60461	2.53474
	72	146	161						0.64114	1.29467	1.56767			1.01768	2.05503	2.48837
	67	118	165						0.596616	1.04638	1.60662			0.94701	1.66092	2.55019
	73	150	163						0.650045	1.33014	1.58715			1.03182	2.11133	2.51928
	68	115	167						0.605521	1.01977	1.6261			0.961144	1.61869	2.5811
	73	151	165						0.650045	1.33901	1.60662			1.03182	2.12541	2.55019
Figure 2I					Average of internal reference				normalize to Internal reference					normalize to CTL
	CTL	T2D	CE		CTL	T2D	CE		CTL	T2D	CE			CTL	T2D	CE
PRX	90.29	108.24	111.84		101.275	105.99	107		0.891577	1.02123	1.04523		0.926212	0.969105	1.11003	1.13612
(without normalize)	90.39	106.84	119.36						0.892564	1.00802	1.11551			0.970179	1.09567	1.21252
	97.44	119.65	122.23						0.96218	1.12888	1.14234			1.04585	1.22704	1.24167
	98.01	119.9	130.23						0.967809	1.13124	1.2171			1.05197	1.22961	1.32294
	89.38	107.96	111.29						0.882591	1.01859	1.04009			0.959338	1.10716	1.13054
	90.11	106.69	118.58						0.8898	1.0066	1.10822			0.967173	1.09414	1.20459
	98.3	118.46	120.08						0.970672	1.11765	1.12224			1.05508	1.21484	1.21983
	96.46	117.35	129.73						0.952503	1.10718	1.21243			1.03533	1.20346	1.31786
Figure 2J					Average of internal reference				normalize to Internal reference					normalize to CTL
	CTL	T2D	CE		CTL	T2D	CE		CTL	T2D	CE			CTL	T2D	CE
GRX1	73.2	76.7	111.4		101.275	105.99	107		0.72282	0.723653	1.04112		0.60298	1.2047	1.20609	1.7352
(without normalize)	57.38	106.29	125.8						0.566604	1.00283	1.1757			0.94434	1.67138	1.9595
	63.46	68.27	96.97						0.626642	0.644117	0.906262			1.0444	1.07353	1.51044
	49.6	92.61	110.69						0.48978	0.873762	1.03449			0.8163	1.45627	1.72414
	64.59	69.9	99.65						0.6378	0.659496	0.931308			1.063	1.09916	1.55218
	50.3	94.4	114.24						0.496692	0.89065	1.06766			0.82782	1.48442	1.77944
	72.9	78.8	111.3						0.719858	0.743466	1.04019			1.19976	1.23911	1.73364
	57.08	105.58	126.05						0.563642	0.996132	1.17804			0.939403	1.66022	1.9634
Figure 2K					Average of internal reference				normalize to Internal reference					normalize to CTL
	CTL	T2D	CE		CTL	T2D	CE		CTL	T2D	CE			CTL	T2D	CE
TRX1	96.16	102.6	127.88		101.275	105.99	107		0.949541	0.968016	1.19514		0.946381	1.01015	1.0298	1.27143
(without normalize)	87.7	106.72	122.75						0.866002	1.00689	1.1472			0.921278	1.07116	1.22042
	104.8	118.04	140.05						1.03486	1.11369	1.30888			1.10091	1.18478	1.39242
	99.1	120.7	134.42						0.978572	1.13879	1.25626			1.04103	1.21148	1.33645
	103.96	116.92	142.8						1.02656	1.10312	1.33458			1.09209	1.17354	1.41977
	98.01	120.7	138.35						0.967809	1.13879	1.29299			1.02958	1.21148	1.37552
	92.49	100	123.24						0.913301	0.943485	1.15178			0.971597	1.00371	1.22529
	84.5	103.36	118.28						0.834403	0.975186	1.10542			0.887663	1.03743	1.17598
Figure 2M
					Average of internal reference				normalize to Internal reference					normalize to CTL
	Ctl	T2D	CE		CTL	T2D	CE		CTL	T2D	CE			Ctl	T2D	CE
3-NT	23.2	68.58	44.58		75.115	88.91	90.445		0.30886	0.771342	0.492896		0.495024	0.617719	1.54268	0.985792
	36.6	79.74	38.01						0.487253	0.896862	0.420255			0.974506	1.79372	0.840511
	23	82.5	57.19						0.306197	0.927905	0.632318			0.612394	1.85581	1.26464
	43.22	100.6	46.4						0.575384	1.13148	0.513019			1.15077	2.26296	1.02604
	31.13	101.48	69.9						0.414431	1.14138	0.772845			0.828862	2.28276	1.54569
	52.4	118.7	49.71						0.697597	1.33506	0.549616			1.39519	2.67012	1.09923
	30.02	108.6	65.19						0.399654	1.22146	0.72077			0.799308	2.44292	1.44154
	57.9	119.34	53.53						0.770818	1.34226	0.591851			1.54164	2.68451	1.1837
Figure 2N	Ctl	T2D	CE
Protein Carbonyl	0.12	0.16	0.13
	0.1	0.19	0.21
	0.09	0.17	0.25
	0.11	0.22	0.18
	0.089
Figure 2O	Ctl	T2D	CE
MDA	3.69295	3.80175	3.32073
	2.89698	4.92985	2.79963
	3.53261	4.08807	3.77885
	3.37418	4.36	3.29974
