# Supplementary material for: Hepatic AMPK signaling dynamic activation in response to REDOX balance are sentinel biomarkers of exercise and antioxidant intervention to improve blood glucose control
Source: eLife. 2022 Sep 26;11:e79939. doi: 10.7554/eLife.79939 (PMC9645808; doi:10.7554/eLife.79939)
Supplement: Figure 3—source data 2. [file elife-79939-fig3-data2.xlsx]

## Sheet: Sheet1
Figure 3_source data_02
Figure 3B	Ctl	T2D	T2D+APO
Protein Carbonyl	0.12	0.16	0.1
	0.1	0.19	0.08
	0.09	0.17	0.065
	0.11	0.22	0.073
	0.089
Figure 3C	Ctl	T2D	T2D+APO
MDA LEVEL	3.69295	4.53261	3.58415
	2.89698	3.80175	3.17758
	3.53261	4.92985	2.98288
	2.5	6.5	4.3
	2.8	6.4	4
	2.33	6.7	4.76
	2.2	6.33	4.1
	2.6	6.8	4.5
Figure 3D	Ctl	T2D	T2D+APO
TAOC	7.4	3.182	4.699
	7.8	4.74833	3.53967
	7.1	4.21	6.5
	7.16	4.6	6
	7.88	3.98	6.11
		3.89	6.6
		4.4	6.75
Figure 3F					Average of internal reference				normalize to Internal reference					normalize to CTL
	CTL	T2D	T2D+APO		CTL	T2D	T2D+APO		CTL	T2D	T2D+APO			CTL	T2D	T2D+APO
Nrf2	176	207.5	150		133.27	133.64	120.61		1.32063	1.55268	1.24368		1.35765	0.978242	1.15013	0.921243
	200	206	138.9						1.50071	1.54145	1.15165			1.11164	1.14182	0.853071
	167.08	198.1	142.3						1.2537	1.48234	1.17984			0.928663	1.09803	0.873952
	188.09	198.8	135.2						1.41135	1.48758	1.12097			1.04544	1.10191	0.830347
	164	194.9	141.2						1.23058	1.4584	1.17072			0.911544	1.08029	0.867197
	186.3	197.7	134.1						1.39791	1.47935	1.11185			1.03549	1.09581	0.823591
	171	203.13	144.7						1.28311	1.51998	1.19973			0.950451	1.12591	0.888692
	195	202.2	138.8						1.4632	1.51302	1.15082			1.08385	1.12076	0.852457
Figure 3G					Average of internal reference				normalize to Internal reference					normalize to CTL
	CTL	T2D	T2D+APO		CTL	T2D	T2D+APO		CTL	T2D	T2D+APO			CTL	T2D	T2D+APO
Sestrin2	124.03	142.6	71.4		133.27	133.64	120.61		0.930667	1.06705	0.591991		1.03486	0.90356	1.03597	0.574748
	150	139.1	93						1.12553	1.04086	0.77108			1.09275	1.01054	0.748622
	120.5	141.36	70.34						0.904179	1.05777	0.583202			0.877844	1.02696	0.566216
	149.6	135.6	91.18						1.12253	1.01467	0.75599			1.08984	0.985113	0.733971
	135	159.3	80.4						1.01298	1.19201	0.666611			0.983477	1.15729	0.647196
	142.2	156.01	105.7						1.06701	1.16739	0.876378			1.03593	1.13339	0.850853
	141.9	167.3	83.5						1.06476	1.25187	0.692314			1.03374	1.21541	0.67215
	140.1	163.9	111.9						1.05125	1.22643	0.927784			1.02063	1.19071	0.900761
Figure 3H					Average of internal reference				normalize to Internal reference					normalize to CTL
	CTL	T2D	T2D+APO		CTL	T2D	T2D+APO		CTL	T2D	T2D+APO			CTL	T2D	T2D+APO
GLUT2	123.6	184.5	166.8		133.27	133.64	120.61		0.927441	1.38057	1.38297		1.11965	0.835532	1.24376	1.24592
(without normalize)	165.3	223.8	146.6						1.24034	1.67465	1.21549			1.11742	1.50869	1.09503
	125.9	186.41	142.6						0.944699	1.39487	1.18232			0.85108	1.25664	1.06516
	165.5	222.66	168.6						1.24184	1.66612	1.39789			1.11877	1.50101	1.25936
	130.9	201.3	177.6						0.982217	1.50629	1.47251			0.88488	1.35701	1.32659
	179.45	238.9	154.3						1.34651	1.78764	1.27933			1.21308	1.61049	1.15255
	124.28	197.21	175.47						0.932543	1.47568	1.45485			0.840129	1.32944	1.31068
	178.8	229.27	154.33						1.34164	1.71558	1.27958			1.20868	1.54557	1.15277
Figure 3I	Postprandial blood glucose
Ctl	T2D	T2D+CE	T2D+APO
5.4	20.9	13.9	12.6
5	19.4	7.7	11.9
6.7	34	5.4	13.2
5.3	32.4	14.5	18
7.1	30.6	9.7	11.2
6.2	24.2	8.9	10.2
Figure 3J	Fasting blood glucose
Ctl	T2D	T2D+CE	T2D+APO
5.5	12.9	4.3	6.7
2.07	5.8	5.6	5.8
7	5.2	7.3	5.8
4	14.1	6.5	7.4
4.1	7.7	7	5.9
5.126	17.4	5.8	4.4
			7.5
			6.4
Figure 3K	OGTT
	Ctl								T2D								T2D+CE								T2D+APO
0 min	5.5	2.07	7	4	4.1	5.126			12.9	5.8	5.2	14.1	7.7	17.4			4.3	5.6	7.3	6.5	7	5.8			6.7	5.8	5.8	7.4	5.9	4.4	7.5	6.4
60 min	10.24	8.35	8	8	9.16	11.78			25.9	9.7	29.1	29.3	23.8	18.2			19.1	15.5	19.4	18	14.9	20.3			8.9	6.9	19.4	9.2	19.7	22	27.8	18.2
120 min	7.01	5.4	5	5.6	8.75	9.9			27.2	5.5	14.1	21.6	20.9	19.4			10.4	12.7	13.4	8.3	9.8	11.7			6.7	6.4	11.4	10	7.7	9.68	17.8	9.2
