# Supplementary material for: Hepatic AMPK signaling dynamic activation in response to REDOX balance are sentinel biomarkers of exercise and antioxidant intervention to improve blood glucose control
Source: eLife. 2022 Sep 26;11:e79939. doi: 10.7554/eLife.79939 (PMC9645808; doi:10.7554/eLife.79939)
Supplement: Figure 4—source data 2. [file elife-79939-fig4-data2.xlsx]

## Sheet: Sheet1
	Figure 4_source data_02
Figure 4A
	CTL	T2D	CE	IE	EE
Blood glucose	5.4	20.9	13.9	8.3	29.6
	5	19.4	7.7	9.8	30
	6.7	34	5.4	11.7	30
	5.3	32.4	14.5	15.01	33
	7.1	30.6	9.7	15.77	19.6
	6.2	24.2	8.9	12.134	22
Figure 4B
	CTL	T2D	CE	IE	EE
OGTT	5.4	20.9	14.6	5.6	34
	5	19.4	11.8	7.4	34
	6.7	34	5.7	7.39	34
	7.01	32.4	21	14.75	33
	5.4	30.6	9.68	11.68	31.5
	5	24.2	6.3	9.86	34
Figure 4D							Average of internal reference						normalize to Internal reference						normalize to CTL
	CTL	T2D	CE	IE	EE		CTL	T2D	CE	IE	EE		CTL	T2D	CE	IE	EE		CTL	T2D	CE	IE	EE
NOX	165.41	167.76	214.7	193.75	220.86		128.755	128.71	129.905	130.02	130.8		1.28474	1.3034	1.65281	1.49016	1.68853		0.980716	0.994958	1.26169	1.13752	1.28896
(without normalize)	181.02	193.87	213.61	200.66	215.54								1.40598	1.50625	1.64442	1.5433	1.64786		1.07327	1.14981	1.25528	1.17809	1.25791
	157.02	160.11	199.45	180.78	204.91								1.21957	1.24396	1.53541	1.3904	1.56659		0.930972	0.949587	1.17207	1.06138	1.19587
	168.81	180.54	197.95	185.43	198.68								1.31115	1.40269	1.52386	1.42617	1.51896		1.00087	1.07075	1.16326	1.08868	1.15951
	159.69	162.68	203.73	185.46	209.74								1.24031	1.26393	1.56836	1.4264	1.60352		0.946802	0.96483	1.19722	1.08885	1.22406
	173.94	184.92	203.83	190.21	204.56								1.35099	1.43672	1.56913	1.46293	1.56391		1.03129	1.09673	1.19781	1.11674	1.19383
	168.65	171.96	221.11	200.77	224.26								1.3099	1.33603	1.70216	1.54415	1.71453		0.999926	1.01987	1.29936	1.17874	1.3088
	184.21	198.38	221.83	206.52	223.6								1.43076	1.54129	1.7077	1.58837	1.70948		1.09218	1.17656	1.30359	1.2125	1.30495
Figure 4E							Average of internal reference						normalize to Internal reference						normalize to CTL
	CTL	T2D	CE	IE	EE		CTL	T2D	CE	IE	EE		CTL	T2D	CE	IE	EE		CTL	T2D	CE	IE	EE
COX	162.76	159.09	181.78	201.93	214.77		128.755	128.71	129.905	130.02	130.8		1.26416	1.23603	1.39938	1.55307	1.64197		1.07132	1.04749	1.18592	1.31616	1.3915
(without normalize)	149	164.41	183.47	215.58	190.14								1.15728	1.27737	1.41239	1.65805	1.45367		0.980747	1.08252	1.19694	1.40513	1.23192
	162.46	159.02	179.51	197.08	208.78								1.26183	1.23549	1.38191	1.51577	1.59618		1.06934	1.04703	1.17111	1.28455	1.35269
	150.68	170	181.07	213.48	187.31								1.17033	1.3208	1.39392	1.6419	1.43203		0.991805	1.11932	1.18129	1.39144	1.21359
	145.3	148.01	163.95	171.97	183.61								1.12854	1.14995	1.26212	1.32264	1.40375		0.956393	0.974533	1.0696	1.12088	1.18962
	140.88	159.43	167.61	182.96	165.87								1.09421	1.23868	1.2903	1.40717	1.26812		0.9273	1.04973	1.09347	1.19252	1.07468
	156.67	159.41	178.35	192.52	208.67								1.21685	1.23852	1.37298	1.4807	1.59534		1.03123	1.04959	1.16354	1.25483	1.35198
	151.31	163.78	181.55	204.86	187.41								1.17522	1.27247	1.39761	1.5756	1.4328		0.995952	1.07837	1.18442	1.33526	1.21424
Figure 4G
	CTL	T2D	CE	IE	EE			CTL	T2D	CE	IE	EE			CTL	T2D	CE	IE	EE
ace-sod2	89.58	143.51	156.35	128.15	129.75		sod2	167.498	175.535	190.153	182.676	177.594		Ace-SOD2/SOD2	0.534838	0.817581	0.822246	0.701538	0.730615
(without normalize)	97.78	156.78	146.46	103.3	163.62		(without normalize)								0.583796	0.893181	0.770234	0.565501	0.921336
	101.74	172.21	168.68	153.44	158.59										0.607439	0.981086	0.887089	0.839985	0.893012
	110.14	147.78	167.36	118.04	203.26										0.657591	0.841907	0.880147	0.646193	1.14455
	94.5	153.92	167.86	136.83	140.79										0.564213	0.876887	0.882777	0.749056	0.792781
	100.55	135.06	158	106.83	179.91										0.600334	0.769441	0.830923	0.584825	1.01306
	97.82	160.17	170.14	146.46	147.94										0.584035	0.912494	0.894767	0.801774	0.833042
	103.63	140.94	165.83	109.43	188.84										0.618724	0.80294	0.872101	0.599058	1.06335
Figure 4H							Average of internal reference						normalize to Internal reference						normalize to CTL
	CTL	T2D	CE	IE	EE		CTL	T2D	CE	IE	EE		CTL	T2D	CE	IE	EE		CTL	T2D	CE	IE	EE
GRX1	147.02	150.07	184.16	130.64	154.27		158.39	124.445	134.96	123.575	123.395		0.928215	1.20596	1.36455	1.05721	1.25026		1.05479	1.37041	1.55063	1.20138	1.42075
(without normalize)	145.32	128.9	190.8	146.01	153.47								0.917482	1.03584	1.41375	1.1816	1.24378		1.04259	1.17709	1.60654	1.34272	1.41339
	150.6	155.09	188.98	133.86	157.71								0.950818	1.2463	1.40027	1.08327	1.27814		1.08047	1.41625	1.59121	1.23099	1.45243
	149.28	132.33	196.4	149.19	157.29								0.942484	1.0634	1.45525	1.20733	1.27474		1.071	1.20841	1.65369	1.37197	1.44857
	138.89	140.88	166.35	122.64	140.11								0.876886	1.13211	1.23259	0.992474	1.13551		0.996462	1.28649	1.40067	1.12781	1.29035
	134.47	120.9	174.76	135.6	143.04								0.84898	0.971553	1.2949	1.09735	1.15925		0.96475	1.10404	1.47148	1.24699	1.31733
	133.2	133.11	158.81	117.07	134.5								0.840962	1.06967	1.17672	0.947398	1.09004		0.955639	1.21554	1.33718	1.07659	1.23868
	127.79	115.76	164.37	128.32	135.83								0.806806	0.930248	1.21792	1.03844	1.10082		0.916825	1.0571	1.384	1.18005	1.25093
Figure 4I
	CTL	T2D	CE	IE	EE		CTL	T2D	CE	IE	EE		CTL	T2D	CE	IE	EE		CTL	T2D	CE	IE	EE
TRX1	134.34	139.5	157.56	129.52	133.11		158.39	124.445	134.96	123.575	123.395		0.84816	1.12102	1.16746	1.04815	1.07877		0.8835	1.16773	1.2161	1.09182	1.12372
(without normalize)	139.16	126.41	158.28	133.14	113.31								0.878591	1.01583	1.17279	1.07745	0.918308		0.915199	1.05816	1.22166	1.12234	0.956571
	150.2	154.89	179.13	143.4	150.28								0.948292	1.2447	1.32728	1.16048	1.21793		0.987804	1.29656	1.38259	1.20883	1.26867
	155.2	138.03	179.22	148.56	126.71								0.97986	1.10921	1.32795	1.20223	1.02691		1.02069	1.15543	1.38328	1.25233	1.06969
	158	168.48	194.16	150.72	162.06								0.997538	1.35391	1.43865	1.21971	1.3134		1.0391	1.41032	1.49859	1.27053	1.36812
	165.85	147.05	194.22	159.04	136.79								1.0471	1.18169	1.43909	1.28704	1.1086		1.09073	1.23093	1.49906	1.34067	1.15479
	159.29	164.31	191.24	149.26	160.3								1.00568	1.3204	1.41701	1.2079	1.29913		1.04759	1.37541	1.47605	1.25823	1.35326
	163.52	144.94	191.32	157.47	134.99								1.03239	1.16474	1.41761	1.27434	1.09401		1.0754	1.21327	1.47667	1.32744	1.13959
Figure 4J
	CTL	T2D	CE	IE	EE
Carbonyl	0.12	0.16	0.13	0.11	0.22
	0.1	0.19	0.21	0.18	0.28
	0.09	0.17	0.25	0.16	0.32
	0.11	0.22	0.18	0.1	0.39
	0.089
Figure 4K
	CTL	T2D	CE	IE	EE
MDA	3.69295	3.80175	3.32073	3.58415	3.95636
	2.89698	4.92985	2.79963	3.17758	3.48107
	3.53261	4.08807	3.77885	2.98288	4.48892
	3.37418	3.53261	3.29974	3.2482	3.97545
Figure 4L		AMP	ATP	AMP/ATP
AMP/ATP	CTL	15870	44364	0.357722
HPLC-Height		15837	44493	0.355944
		20915	53344	0.392078
		20112	51407	0.391231
	T2D	22118	44029	0.502351
		21834	43369	0.503447
		23683	54499	0.434558
		23165	53479	0.433161
	CE	22699	48020	0.472699
		22078	46350	0.476332
		27468	64532	0.425649
		27582	64168	0.42984
	IE	21577	56819	0.37975
		22477	59590	0.377194
		20913	60895	0.343427
		20671	59929	0.344925
	EE	27173	143993	0.188711
		28836	125569	0.229643
		37125	72615	0.511258
		37230	72528	0.513319
Figure 4N
							Average of internal reference						normalize to Internal reference						normalize to CTL
	CTL	T2D	CE	IE	EE		CTL	T2D	CE	IE	EE		CTL	T2D	CE	IE	EE		CTL	T2D	CE	IE	EE
P-AMPK	14	32.4	166.57	149.71	30.07		141.617	143.067	142.235	143.015	122.166		0.0988631	0.226478	1.17113	1.04685	0.246153		0.470777	1.07847	5.57682	4.985	1.17216
(without normalize)	51.76	54.01	154.46	122.74	35.39								0.365511	0.377534	1.08599	0.858262	0.289702		1.74053	1.79778	5.17137	4.08696	1.37953
	12.82	29.27	159.18	139.95	26.7								0.0905303	0.204599	1.11917	0.978603	0.218566		0.431097	0.974283	5.3294	4.66001	1.04079
	45.68	47.66	151.87	118.16	31.92								0.322576	0.333147	1.06778	0.826236	0.261297		1.53608	1.58641	5.08465	3.93446	1.24427
	14.81	37.55	194.53	174.63	34.67								0.104583	0.262477	1.36771	1.2211	0.283808		0.498014	1.24989	6.51293	5.81478	1.35147
	60.92	63.13	179.32	143.17	41.3								0.430196	0.441283	1.26077	1.00112	0.338081		2.04855	2.10135	6.00369	4.76723	1.60991
	12.02	23.36	122.01	107.7	22.3								0.084881	0.163288	0.857836	0.753094	0.182547		0.404195	0.777563	4.08493	3.58616	0.869274
	34.75	37.08	121.07	92.13	29.61								0.245392	0.259192	0.851227	0.644221	0.242387		1.16853	1.23425	4.05346	3.06772	1.15422
