# Supplementary material for: Hepatic AMPK signaling dynamic activation in response to REDOX balance are sentinel biomarkers of exercise and antioxidant intervention to improve blood glucose control
Source: eLife. 2022 Sep 26;11:e79939. doi: 10.7554/eLife.79939 (PMC9645808; doi:10.7554/eLife.79939)
Supplement: Figure 5—source data 2. [file elife-79939-fig5-data2.xlsx]

## Sheet: Sheet1
Figure 5_source data_02
Figure 5B																		Normalize to CTL
	CTL	T2D	CE	IE			CTL	T2D	CE	IE			CTL	T2D	CE	IE		CTL	T2D	CE	IE
pfk2	134.17	223.94	183.39	133		p-pfk2	171.24	201.15	189.91	206.1		p-pfk2/pfk2	1.27629	0.898232	1.03555	1.54962		1.2272	0.863684	0.995724	1.49002
(without normalize)	143.67	195.27	190.31	149.08		(without normalize)	177.62	206.98	215.92	212.98			1.23631	1.05997	1.13457	1.42863		1.18876	1.0192	1.09093	1.37368
	152.97	214.12	194.81	145.17			158.76	195.64	171.31	192.83			1.03785	0.913693	0.87937	1.3283		0.997933	0.878551	0.845548	1.27722
	155.83	202.63	212.91	166.69			160	194.38	197.14	192.28			1.02676	0.959285	0.925931	1.15352		0.987269	0.92239	0.890318	1.10915
	157.98	218.43	199.45	148.77			162.72	172.51	166.72	181.01			1.03	0.789772	0.835899	1.21671		0.990388	0.759397	0.803749	1.16991
	159.68	220.26	216.89	169.58			158.06	187.68	195.83	185.47			0.989855	0.852084	0.9029	1.0937		0.951783	0.819311	0.868173	1.05164
	166.24	235.35	216.94	136.26			152.97	178.16	159.91	180.3			0.920176	0.757	0.737116	1.12589		0.884784	0.727885	0.708766	1.08259
	162.45	218.47	232.3	160.14			152.68	192.7	189.7	185.11			0.939858	0.882043	0.816616	1.35851		0.90371	0.848119	0.785208	1.30626
Figure 5C
Liver glucose	Ctl	T2D	T2D+CE	T2D+IE
normalize to CTL	1.21513	2.36357	1.21307	1.0667
	1.33519	2.25685	2.19743	1.0399
	0.63934	2.21562	1.45525	1.41038
	1.05251	2.40844	2.63158	1.38855
	0.8244	2.33204	1.22969	2.12467
	0.933665	2.39025	1.21004	2.09192
Figure 5D
	Ctl					T2D					T2D+CE					T2D+IE
Ace-CoA	1.11021	1.05834	0.809658	1.11798	0.903817	0.823574	0.974662	0.860985	0.906347	0.922613	0.729054	1.05744	1.28154	1.1028	1.07641	0.839297	1.16967	1.12141	1.1225	1.20888
Citrate	0.474079	0.45652	0.408011	1.61836	2.04303	0.906791	0.605619	1.1785	1.06422	1.14725	1.60496	1.6993	1.27641	1.60645	0.775847	2.24362	1.86447	2.26415	0.996667	0.975835
DHAP	1.0469	0.523256	0.627907	1.35659	1.49612	1.04264	0.732558	1.46163	1.35581	1.14729	2.50426	2.39961	1.77558	1.88411	1.77946	1.77984	1.67481	1.35659	0.728682	1.25194
Glutamate	1.11383	0.952743	0.714265	1.10958	1.10988	0.633211	0.583321	0.449744	1.00293	1.01273	0.668471	0.629261	0.501683	0.597952	0.397367	1.17893	1.23643	0.994587	2.87491	2.95099
Lactate	0.763692	0.905477	0.577426	0.963025	1.79149	1.40339	1.38782	1.41507	1.48318	1.43647	1.72477	1.87684	1.6878	1.5777	0.796219	1.03642	1.11815	1.01612	1.10147	1.3275
Malate	0.475994	0.28168	0.542109	1.81917	1.88115	0.867277	0.923849	0.784632	0.704939	1.64305	1.28099	1.47383	1.1339	1.1039	0.457891	1.19097	1.10832	1.14276	1.87672	1.84425
OAA	0.943324	0.788017	1.02782	0.740763	1.50007	1.32784	1.06227	1.22597	1.3561	1.43854	1.10261	1.13823	0.67231	0.710584	1.39025	1.81363	1.85485	1.65612	2.21404	2.04622
Succinate	0.689579	0.840355	0.184257	0.306245	2.98115	1.67923	1.75905	0.451959	1.28566	1.34035	2.33703	2.1031	1.55026	1.55211	0.484109	1.52254	1.50591	1.52809	1.62712	1.44974
α-KG	0.713154	0.630741	1.11233	0.92357	1.62046	1.1098	1.15193	0.760512	0.905031	0.980029	1.34322	1.12497	1.36766	1.36176	0.637061	1.16373	1.02975	0.988455	1.03059	1.05313
Figure 5F
						Average of internal reference					Normalize to internal reference					Normalize to CTL
foxo1	CTL	T2D	CE	IE		CTL	T2D	CE	IE		CTL	T2D	CE	IE		CTL	T2D	CE	IE
	140.7	178	160.7	160.9		56.16	61.65	63.39	66.4		2.50534	2.88727	2.5351	2.42319		0.921082	1.0615	0.932022	0.89088
	156.69	174.28	156.29	145.5							2.79006	2.82693	2.46553	2.19127		1.02576	1.03931	0.906445	0.805612
	153.62	198.8	177.6	179.82							2.7354	3.22466	2.8017	2.70813		1.00566	1.18554	1.03004	0.995637
	152.42	192.5	172.08	159.88							2.71403	3.12247	2.71462	2.40783		0.997806	1.14797	0.998023	0.885232
	146.47	188.97	167.55	172							2.60808	3.06521	2.64316	2.59036		0.958854	1.12691	0.971751	0.952339
	164.09	181.61	162.55	151.95							2.92183	2.94582	2.56428	2.2884		1.0742	1.08302	0.942752	0.841325
	145.89	189.21	168.26	171.14							2.59776	3.0691	2.65436	2.57741		0.955058	1.12835	0.975868	0.947577
	164.8	182.92	162.11	152.92							2.93447	2.96707	2.55734	2.30301		1.07885	1.09084	0.9402	0.846696
Figure 5G						Average of internal reference					Normalize to internal reference					Normalize to CTL
	CTL	T2D	CE	IE		CTL	T2D	CE	IE		CTL	T2D	CE	IE		CTL	T2D	CE	IE
glut2	36.59	129.52	33	24.15		56.16	61.65	63.39	66.4		0.651531	2.10089	0.520587	0.363705		1.03418	3.33475	0.826328	0.577309
	34.52	89	24	24.7							0.614672	1.44363	0.378609	0.371988		0.97567	2.29148	0.600966	0.590457
	36.44	121.47	33.06	24.28							0.64886	1.97032	0.521533	0.365663		1.02994	3.12749	0.827831	0.580417
	34.52	81.9	25	24.7							0.614672	1.32847	0.394384	0.371988		0.97567	2.10868	0.626006	0.590457
	36.4	131.57	35.59	25.48							0.648148	2.13414	0.561445	0.383735		1.02881	3.38753	0.891183	0.609103
	35.59	88.6	25.92	28.37							0.633725	1.43715	0.408897	0.427259		1.00591	2.28118	0.649043	0.678189
	38.22	140.46	36.6	25.79							0.680556	2.27835	0.577378	0.388404		1.08025	3.61642	0.916473	0.616514
	34.55	95.17	26.39	28.33							0.615207	1.54371	0.416312	0.426657		0.976518	2.45034	0.660812	0.677233
Figure 5H
	CTL	T2D	CE	IE
	0.357324	1.43029	1.3906	0.918193
PEPCK-mRNA	0.924927	2.2933	2.85234	1.07144
Fold change	0.626052	1.01539	1.80023	0.941134
	0.561814	6.9868	2.22585	1.11243
	1.09697	5.41922	1.94	0.452139
	0.606043	5.05353	1.32196	0.697588
	1.16729	4.69111	1.82272	1.01265
	1.1445	1.32476	2.0922	0.706227
	1.64306	1.58164	2.49	0.737606
		4.15		0.60584
		3.71		0.997024
Figure 5I
	CTL	T2D	CE	IE
	0.790169	2.57189	1.45844	0.390047
G6Pase-mRNA	0.16695	0.702124	0.553465	0.574239
Fold change	0.753099	0.786021	0.70054	1.17564
	0.212184	1.26771	0.889346	1.73992
	1.68046	2.26256	0.483049	0.348051
	0.167466	0.721142	0.631473	0.730834
	1.42259	2.26065	1.01944	0.740941
	1.48444	1.31018	0.453373	1.85942
	1.56581	2.37059	0.82741	0.509148
		2.20007		0.492969
		2.47661		0.637497
