# Supplementary material for: Hepatic AMPK signaling dynamic activation in response to REDOX balance are sentinel biomarkers of exercise and antioxidant intervention to improve blood glucose control
Source: eLife. 2022 Sep 26;11:e79939. doi: 10.7554/eLife.79939 (PMC9645808; doi:10.7554/eLife.79939)
Supplement: Figure 6—source data 2. [file elife-79939-fig6-data2.xlsx]

## Sheet: Sheet1
	Figure 6_source data_02
Figure 6B							Average of internal reference						normalize to Internal reference						normalize to CTL
	CTL	T2D	CE	IE	EE		CTL	T2D	CE	IE	EE								CTL	T2D	CE	IE	EE
MFN1	104.39	159.47	136.02	121.25	101.44		75.13	85.29	97.63	96.58	102.74		1.38946	1.86974	1.39322	1.25544	0.987347	1.24037	1.12053	1.50785	1.12356	1.01245	0.796247
	95.42	160.87	130.52	121.48	66.6								1.27007	1.88615	1.33688	1.25782	0.648238		1.02425	1.52109	1.07813	1.01437	0.522773
	97.79	149.06	127.6	113.9	94.61								1.30161	1.74768	1.30698	1.17933	0.920868		1.04969	1.40942	1.05401	0.951075	0.742636
	89.22	150.5	121.14	112.46	62.94								1.18754	1.76457	1.24081	1.16442	0.612614		0.957695	1.42304	1.00065	0.939051	0.494044
	89.53	136.34	115.71	102.76	85.98								1.19167	1.59855	1.18519	1.06399	0.83687		0.961022	1.28915	0.955798	0.858055	0.674895
	82.44	135.31	110.78	103.26	58.29								1.0973	1.58647	1.13469	1.06917	0.567354		0.884918	1.27941	0.915074	0.86223	0.457544
	97.94	149.13	127.6	118.36	98.94								1.30361	1.74851	1.30698	1.22551	0.963013		1.0513	1.41008	1.05401	0.988317	0.776624
	88.78	150.17	125.73	117.93	65.37								1.18169	1.7607	1.28782	1.22106	0.636266		0.952972	1.41992	1.03857	0.984726	0.513118
Figure 6C							Average of internal reference
	CTL	T2D	CE	IE	EE		CTL	T2D	CE	IE	EE								CTL	T2D	CE	IE	EE
ATG5	134.68	153.55	65.76	42.41	65.66		75.13	85.29	97.63	96.58	102.74		1.79263	1.80033	0.673563	0.439118	0.639089	1.46929	1.28045	1.28595	0.481117	0.313656	0.456492
	74.46	149.52	45.73	75.89	142.53								0.991082	1.75308	0.468401	0.785773	1.38729		0.707916	1.2522	0.334572	0.561267	0.99092
	125.37	149.89	62.81	41.3	62.58								1.66871	1.75742	0.643347	0.427625	0.60911		1.19193	1.2553	0.459534	0.305446	0.435079
	69.37	139.31	43.77	71.54	130.69								0.923333	1.63337	0.448325	0.740733	1.27205		0.659523	1.16669	0.320232	0.529095	0.908604
	163.06	191.18	78.53	50.9	77.12								2.17037	2.24153	0.804363	0.527024	0.750633		1.55027	1.60109	0.574545	0.376446	0.536166
	90.39	184.1	54.69	92.48	160.66								1.20311	2.15852	0.560176	0.957548	1.56375		0.859368	1.5418	0.400126	0.683963	1.11697
	144.61	175.25	71.31	45.91	71.84								1.9248	2.05475	0.730411	0.475357	0.699241		1.37486	1.46768	0.521722	0.339541	0.499458
	81.16	167.01	49.91	83.94	149.85								1.08026	1.95814	0.511216	0.869124	1.45854		0.771615	1.39867	0.365154	0.620803	1.04181
Figure 6D							Average of internal reference
	CTL	T2D	CE	IE	EE		CTL	T2D	CE	IE	EE								CTL	T2D	CE	IE	EE
Fis	110.43	91.27	73.62	66.78	150.56		75.13	85.29	97.63	96.58	102.74		1.46985	1.07011	0.754071	0.691448	1.46545	1.25148	1.17588	0.856091	0.603257	0.553158	1.17236
	97.68	84.31	43.99	106.6	239.3								1.30015	0.98851	0.450579	1.10375	2.32918		1.04012	0.790808	0.360463	0.882999	1.86334
	99.36	81.86	65.3	59.06	138.5								1.32251	0.959784	0.668852	0.611514	1.34806		1.05801	0.767827	0.535081	0.489211	1.07845
	83.15	76.08	39.78	95.86	242.87								1.10675	0.892015	0.407457	0.992545	2.36393		0.885399	0.713612	0.325965	0.794036	1.89114
	104.45	83.83	66.87	59.02	142.33								1.39026	0.982882	0.684933	0.6111	1.38534		1.11221	0.786306	0.547946	0.48888	1.10827
	88.3	77.6	41.09	97.45	242.58								1.1753	0.909837	0.420875	1.00901	2.36111		0.940237	0.72787	0.3367	0.807206	1.88888
	93.61	76.38	56.7	52.46	135.32								1.24597	0.895533	0.580764	0.543177	1.31711		0.996779	0.716426	0.464611	0.434541	1.05369
	75.21	69.39	35.59	92.79	238.62								1.00106	0.813577	0.36454	0.960758	2.32256		0.800852	0.650862	0.291632	0.768606	1.85805
Figure 6E							Average of internal reference
	CTL	T2D	CE	IE	EE		CTL	T2D	CE	IE	EE								CTL	T2D	CE	IE	EE
lc3b	66.92	137.73	53.82	46.93	74.35		75.13	85.29	97.63	96.58	102.74		0.890723	1.61484	0.551265	0.485918	0.723671	1.07319	0.832451	1.5092	0.515201	0.454129	0.676328
	73.8	114.73	49.86	57.17	72.05								0.982297	1.34518	0.510704	0.591945	0.701285		0.918035	1.25717	0.477293	0.553219	0.655406
	75.63	164.07	67.43	58.18	90.24								1.00666	1.92367	0.690669	0.602402	0.878334		0.940799	1.79782	0.645485	0.562993	0.820873
	84.5	139.18	64.55	73.13	87.66								1.12472	1.63184	0.66117	0.757196	0.853222		1.05114	1.52509	0.617916	0.70766	0.797403
	72.14	151.42	61.37	53.89	82.65								0.960202	1.77535	0.628598	0.557983	0.804458		0.897385	1.65921	0.587475	0.521479	0.75183
	79.33	131.66	60.01	66.19	80.47								1.0559	1.54367	0.614668	0.685339	0.783239		0.986825	1.44269	0.574456	0.640503	0.731999
	96.29	170.9	89	80.98	119.01								1.28165	2.00375	0.911605	0.838476	1.15836		1.1978	1.87267	0.851967	0.783622	1.08258
	96.42	159.2	94.53	109	127.66								1.28338	1.86657	0.968247	1.1286	1.24255		1.19942	1.74446	0.904904	1.05476	1.16127
Figure 6F							Average of internal reference
	CTL	T2D	CE	IE	EE		CTL	T2D	CE	IE	EE		CTL	T2D	CE	IE	EE		CTL	T2D	CE	IE	EE
PGC1a	77.5	63.12	109.88	93.11	71.65		75.13	85.29	97.63	96.58	102.74		1.03155	0.740063	1.12547	0.964071	0.697391	0.978055	1.06345	0.762952	1.16028	0.993888	0.71896
	58.42	75.32	106.35	123.81	76.09								0.777586	0.883105	1.08932	1.28194	0.740607		0.801635	0.910417	1.12301	1.32159	0.763513
	86.89	69.72	122.84	102.81	80.28								1.15653	0.817446	1.25822	1.06451	0.78139		1.1923	0.842728	1.29713	1.09743	0.805557
	63.5	83.65	118.91	139.27	82.38								0.845202	0.980771	1.21797	1.44202	0.80183		0.871342	1.0111	1.25563	1.48662	0.826629
	87.44	70.7	121.31	102.44	79.03								1.16385	0.828937	1.24255	1.06068	0.769223		1.19984	0.854574	1.28098	1.09348	0.793014
	66.12	84.29	118.12	142.59	78.32								0.880075	0.988275	1.20987	1.47639	0.762313		0.907293	1.01884	1.24729	1.52205	0.785889
	85.49	68.18	119.62	101.17	79.34								1.13789	0.79939	1.22524	1.04753	0.772241		1.17309	0.824114	1.26313	1.07992	0.796124
	62.49	81.97	115.68	136.8	81.8								0.831758	0.961074	1.18488	1.41644	0.796185		0.857483	0.990798	1.22153	1.46025	0.820809
