# Supplementary material for: Hepatic AMPK signaling dynamic activation in response to REDOX balance are sentinel biomarkers of exercise and antioxidant intervention to improve blood glucose control
Source: eLife. 2022 Sep 26;11:e79939. doi: 10.7554/eLife.79939 (PMC9645808; doi:10.7554/eLife.79939)
Supplement: Figure 7—source data 2. [file elife-79939-fig7-data2.xlsx]

## Sheet: Sheet1
Figure 7_source data_02
Figure 7D
		H2O2 (μM)				Average of Internal reference		H2O2 (μM)						H2O2 (μM)				Normalize to CTL	H2O2 (μM)
	CTL	50	100	200			CTL	50	100	200			CTL	50	100	200		CTL	50	100	200
GSS-protein	113.21	154.18	189.28	134.9			141.29	147.8	146.8	138.07		Normalize to internal reference	0.80126	1.04678	1.28937	0.977041		1.05429	1.37734	1.69654	1.28558
(without normalize)	88.32	125.8	163.6	104.2									0.625097	0.854097	1.11444	0.75469		0.822496	1.12381	1.46637	0.993013
	110.6	153.5	187.62	131.7									0.782787	1.04216	1.27807	0.953864		1.02998	1.37127	1.68166	1.25508
	119.28	166.2	204.8	142.8									0.844221	1.12839	1.3951	1.03426		1.11082	1.48472	1.83565	1.36087
Figure 7F
		H2O2 (μM)				Average of AMPK		H2O2 (μM)						H2O2 (μM)
	CTL	50	100	200			CTL	50	100	200			CTL	50	100	200
P-AMPK	133.85	156.5	188.9	167.3			116.1	122.2	115.19	134.3		P-AMPK/AMPK	1.15289	1.28069	1.6399	1.24572
(without normalize)	147.5	174.67	205.11	176.4									1.27046	1.42938	1.78062	1.31348
	146.7	173.18	204.4	177.17									1.26357	1.41718	1.77446	1.31921
	153.5	179.23	210.2	184.05									1.32214	1.46669	1.82481	1.37044
Figure 7H
		H2O2 (μM)				Average of Internal reference		H2O2 (μM)						H2O2 (μM)				Normalize to CTL	H2O2 (μM)
	CTL	50	100	200			CTL	50	100	200			CTL	50	100	200		CTL	50	100	200
GSS-AMPK	60.9	75.38	126.11	111.4			138.3	145.05	148.56	155.19		Normalize to internal reference	0.440347	0.519683	0.848883	0.71783		0.957276	1.12975	1.8454	1.5605
(without normalize)	66.3	82.27	139.9	116.39									0.479393	0.567184	0.941707	0.749984		1.04216	1.23301	2.04719	1.6304
	64.98	80.7	131.09	113.75									0.469848	0.55636	0.882404	0.732972		1.02141	1.20948	1.91827	1.59342
	65.15	80.11	131.02	113.78									0.471077	0.552292	0.881933	0.733166		1.02408	1.20064	1.91725	1.59384
