# Supplementary material for: Hepatic AMPK signaling dynamic activation in response to REDOX balance are sentinel biomarkers of exercise and antioxidant intervention to improve blood glucose control
Source: eLife journal article supplement (doi:10.7554/elife.79939), 2022-09-23

7D

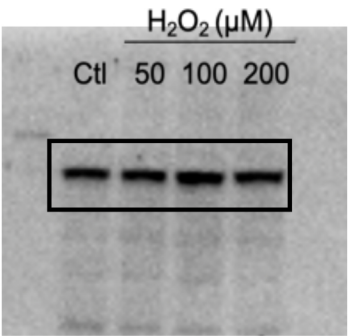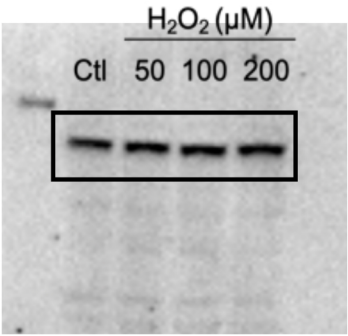

7E

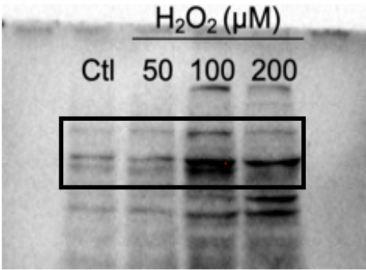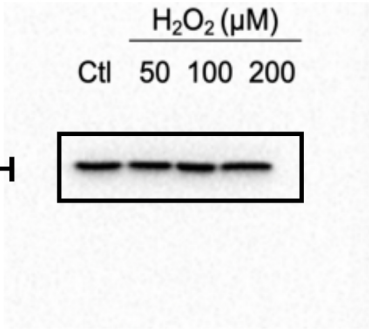

7C

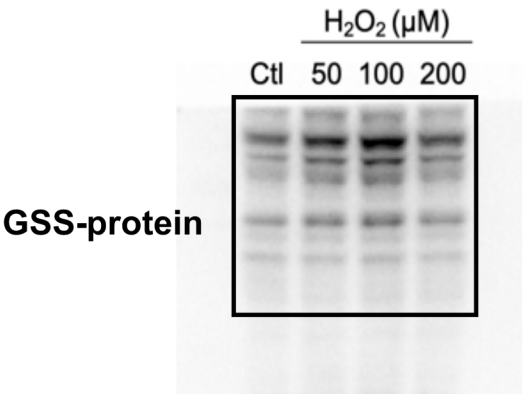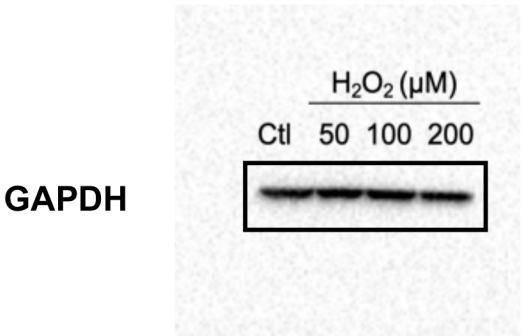

Supplement: supp [file elife-79939-supp-v1.zip]
